# Supplementary material for: A paternal bias in germline mutation is widespread in amniotes and can arise independently of cell division numbers
Source: eLife journal article supplement (doi:10.7554/elife.80008), 2022-08-02
Supplement: supp [file elife-80008-supp-v1.zip]

Archive with 14 entries (14 files):
- elife_poa_e80008_Figure_1_figure_supplement_1.pdf
- elife_poa_e80008_Figure_2_figure_supplement_1.pdf
- elife_poa_e80008_Figure_2_figure_supplement_2.pdf
- elife_poa_e80008_Figure_2_figure_supplement_3.pdf
- elife_poa_e80008_Figure_3_figure_supplement_1.pdf
- elife_poa_e80008_Figure_3_figure_supplement_2.pdf
- elife_poa_e80008_Figure_4_figure_supplement_1.pdf
- elife_poa_e80008_Figure_4_figure_supplement_2.pdf
- elife_poa_e80008_Supplementary_file_1.xlsx
- elife_poa_e80008_Supplementary_file_2.csv
- elife_poa_e80008_Supplementary_file_3.xlsx
- elife_poa_e80008_Supplementary_file_4.xlsx
- elife_poa_e80008_Supplementary_file_5.xlsx
- elife_poa_e80008_Supplementary_file_6.xlsx
