# Supplementary material for: A paternal bias in germline mutation is widespread in amniotes and can arise independently of cell division numbers
Source: eLife journal article supplement (doi:10.7554/elife.80008), 2022-08-02
Supplement: supp [file elife-80008-supp-v1.zip › elife_poa_e80008_Supplementary_file_3.xlsx]

## Sheet: Sheet1
Species	Paternal	Maternal	Total	Stage	Parental age	Ref
Mus_musculus	27	20	140	Early	0.73	[25]
Mus_musculus	107	25	434	Late	0.73	[25]
Homo_sapiens	352	350	745	Early	31.6267	[64]
Homo_sapiens	4158	1091	23399	Late	31.6267	[64]
Bos_taurus	27	23	50	Early	5	[26]
Bos_taurus	124	32	156	Late	5	[26]
