# Supplementary material for: A paternal bias in germline mutation is widespread in amniotes and can arise independently of cell division numbers
Source: eLife journal article supplement (doi:10.7554/elife.80008), 2022-08-02
Supplement: supp [file elife-80008-supp-v1.zip › elife_poa_e80008_Supplementary_file_4.xlsx]

## Sheet: Sheet1
Analysis Group	Species
1	Calidris_pugnax,Columba_livia,Pterocles_burchelli
2	Cuculus_canorus,Egretta_garzetta,Lophotis_ruficrista
3	Bucorvus_abyssinicus,Halcyon_senegalensis,Trogon_melanurus
4	Falco_cherrug,Ficedula_albicollis
5	Haliaeetus_leucocephalus,Psophia_crepitans
6	Anseranas_semipalmata,Cairina_moschata,Gallus_gallus,Penelope_pileata
