# Supplementary material for: A paternal bias in germline mutation is widespread in amniotes and can arise independently of cell division numbers
Source: eLife journal article supplement (doi:10.7554/elife.80008), 2022-08-02
Supplement: supp [file elife-80008-supp-v1.zip › elife_poa_e80008_Supplementary_file_5.xlsx]

## Sheet: Sheet1
Species	Chromosome	Regions	Reference
Bos_taurus	CM000206.6	145000000-150266161	[103]
Homo_sapiens	chrX	10001-2781479,155701383-156030895	NCBI assembly GCF_000001405.38
Canis_lupus_familiaris	chrX	1-6642728	[104]
Felis_catus	CM001396.2	1-6813699	[104]
Ovis_aries	CM001608.2	1-6883022	[105]
Sus_scrofa	CM000830.4	1-6900000	[106]
Macaca_mulatta	CM002997.3	1-1810963	[104]
Microcebus_murinus	CM007693.1	1-5000000	[107]
Mus_musculus	chrX	168000000-171031299	[104]
Crotalus_viridis	CM012323.1	106784505-113984505	[108]
Gallus_gallus	chrZ	1-2000000	[109]
Thamnophis_elegans	NC_045558.1	1-1000000,132000000-145130870	This study
