# Supplementary figures and images for: A paternal bias in germline mutation is widespread in amniotes and can arise independently of cell division numbers
Source: eLife journal article supplement (doi:10.7554/elife.80008), 2022-08-02

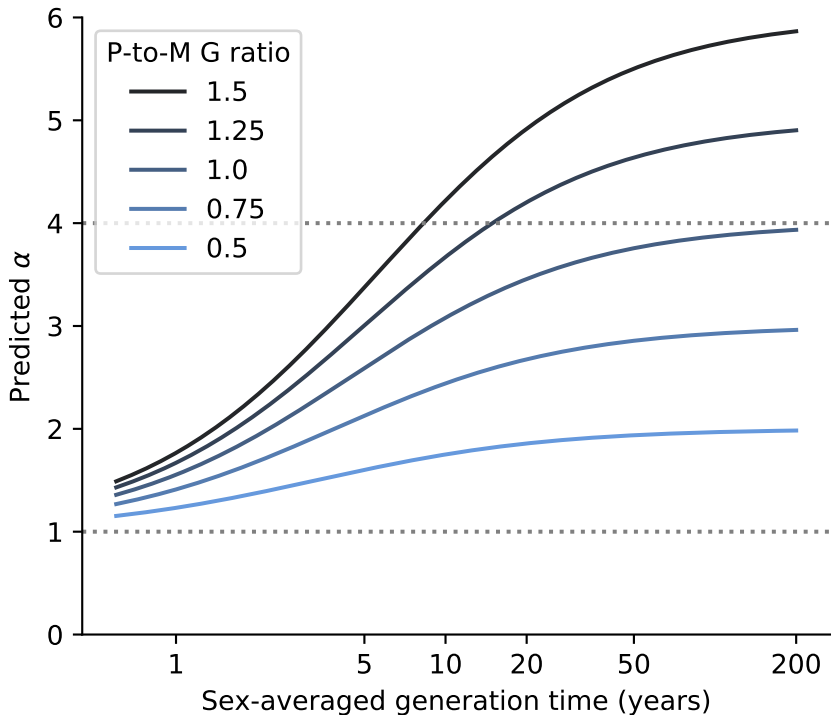

Supplement: supp [file elife-80008-supp-v1.zip]

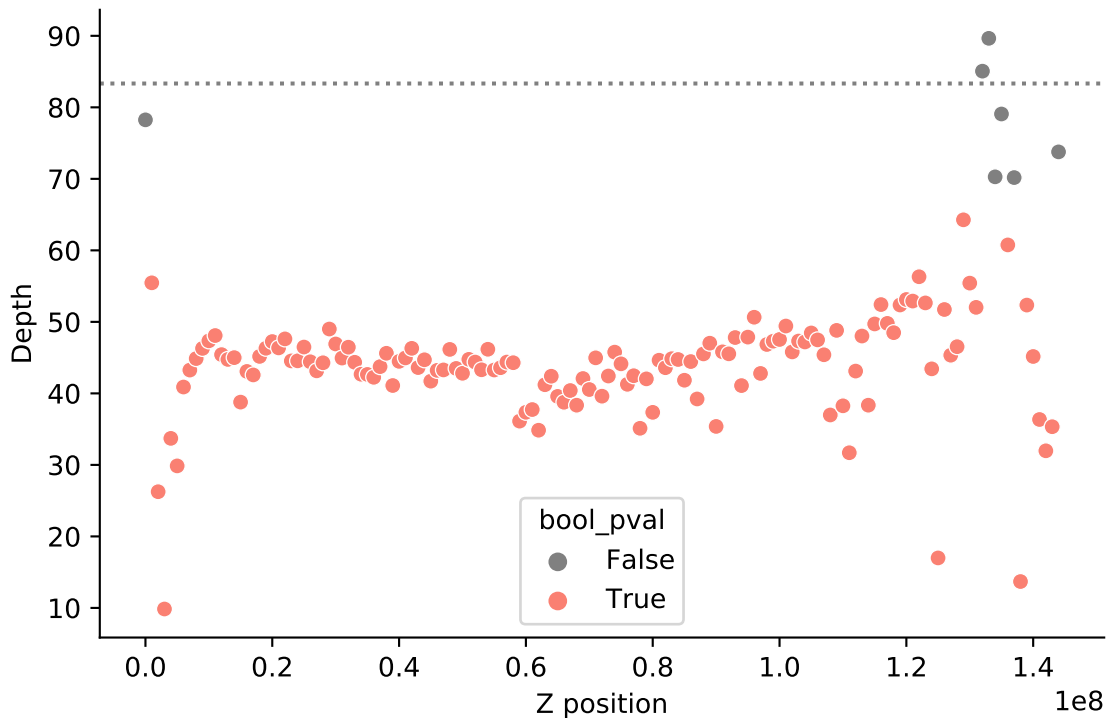

Supplement: supp [file elife-80008-supp-v1.zip]

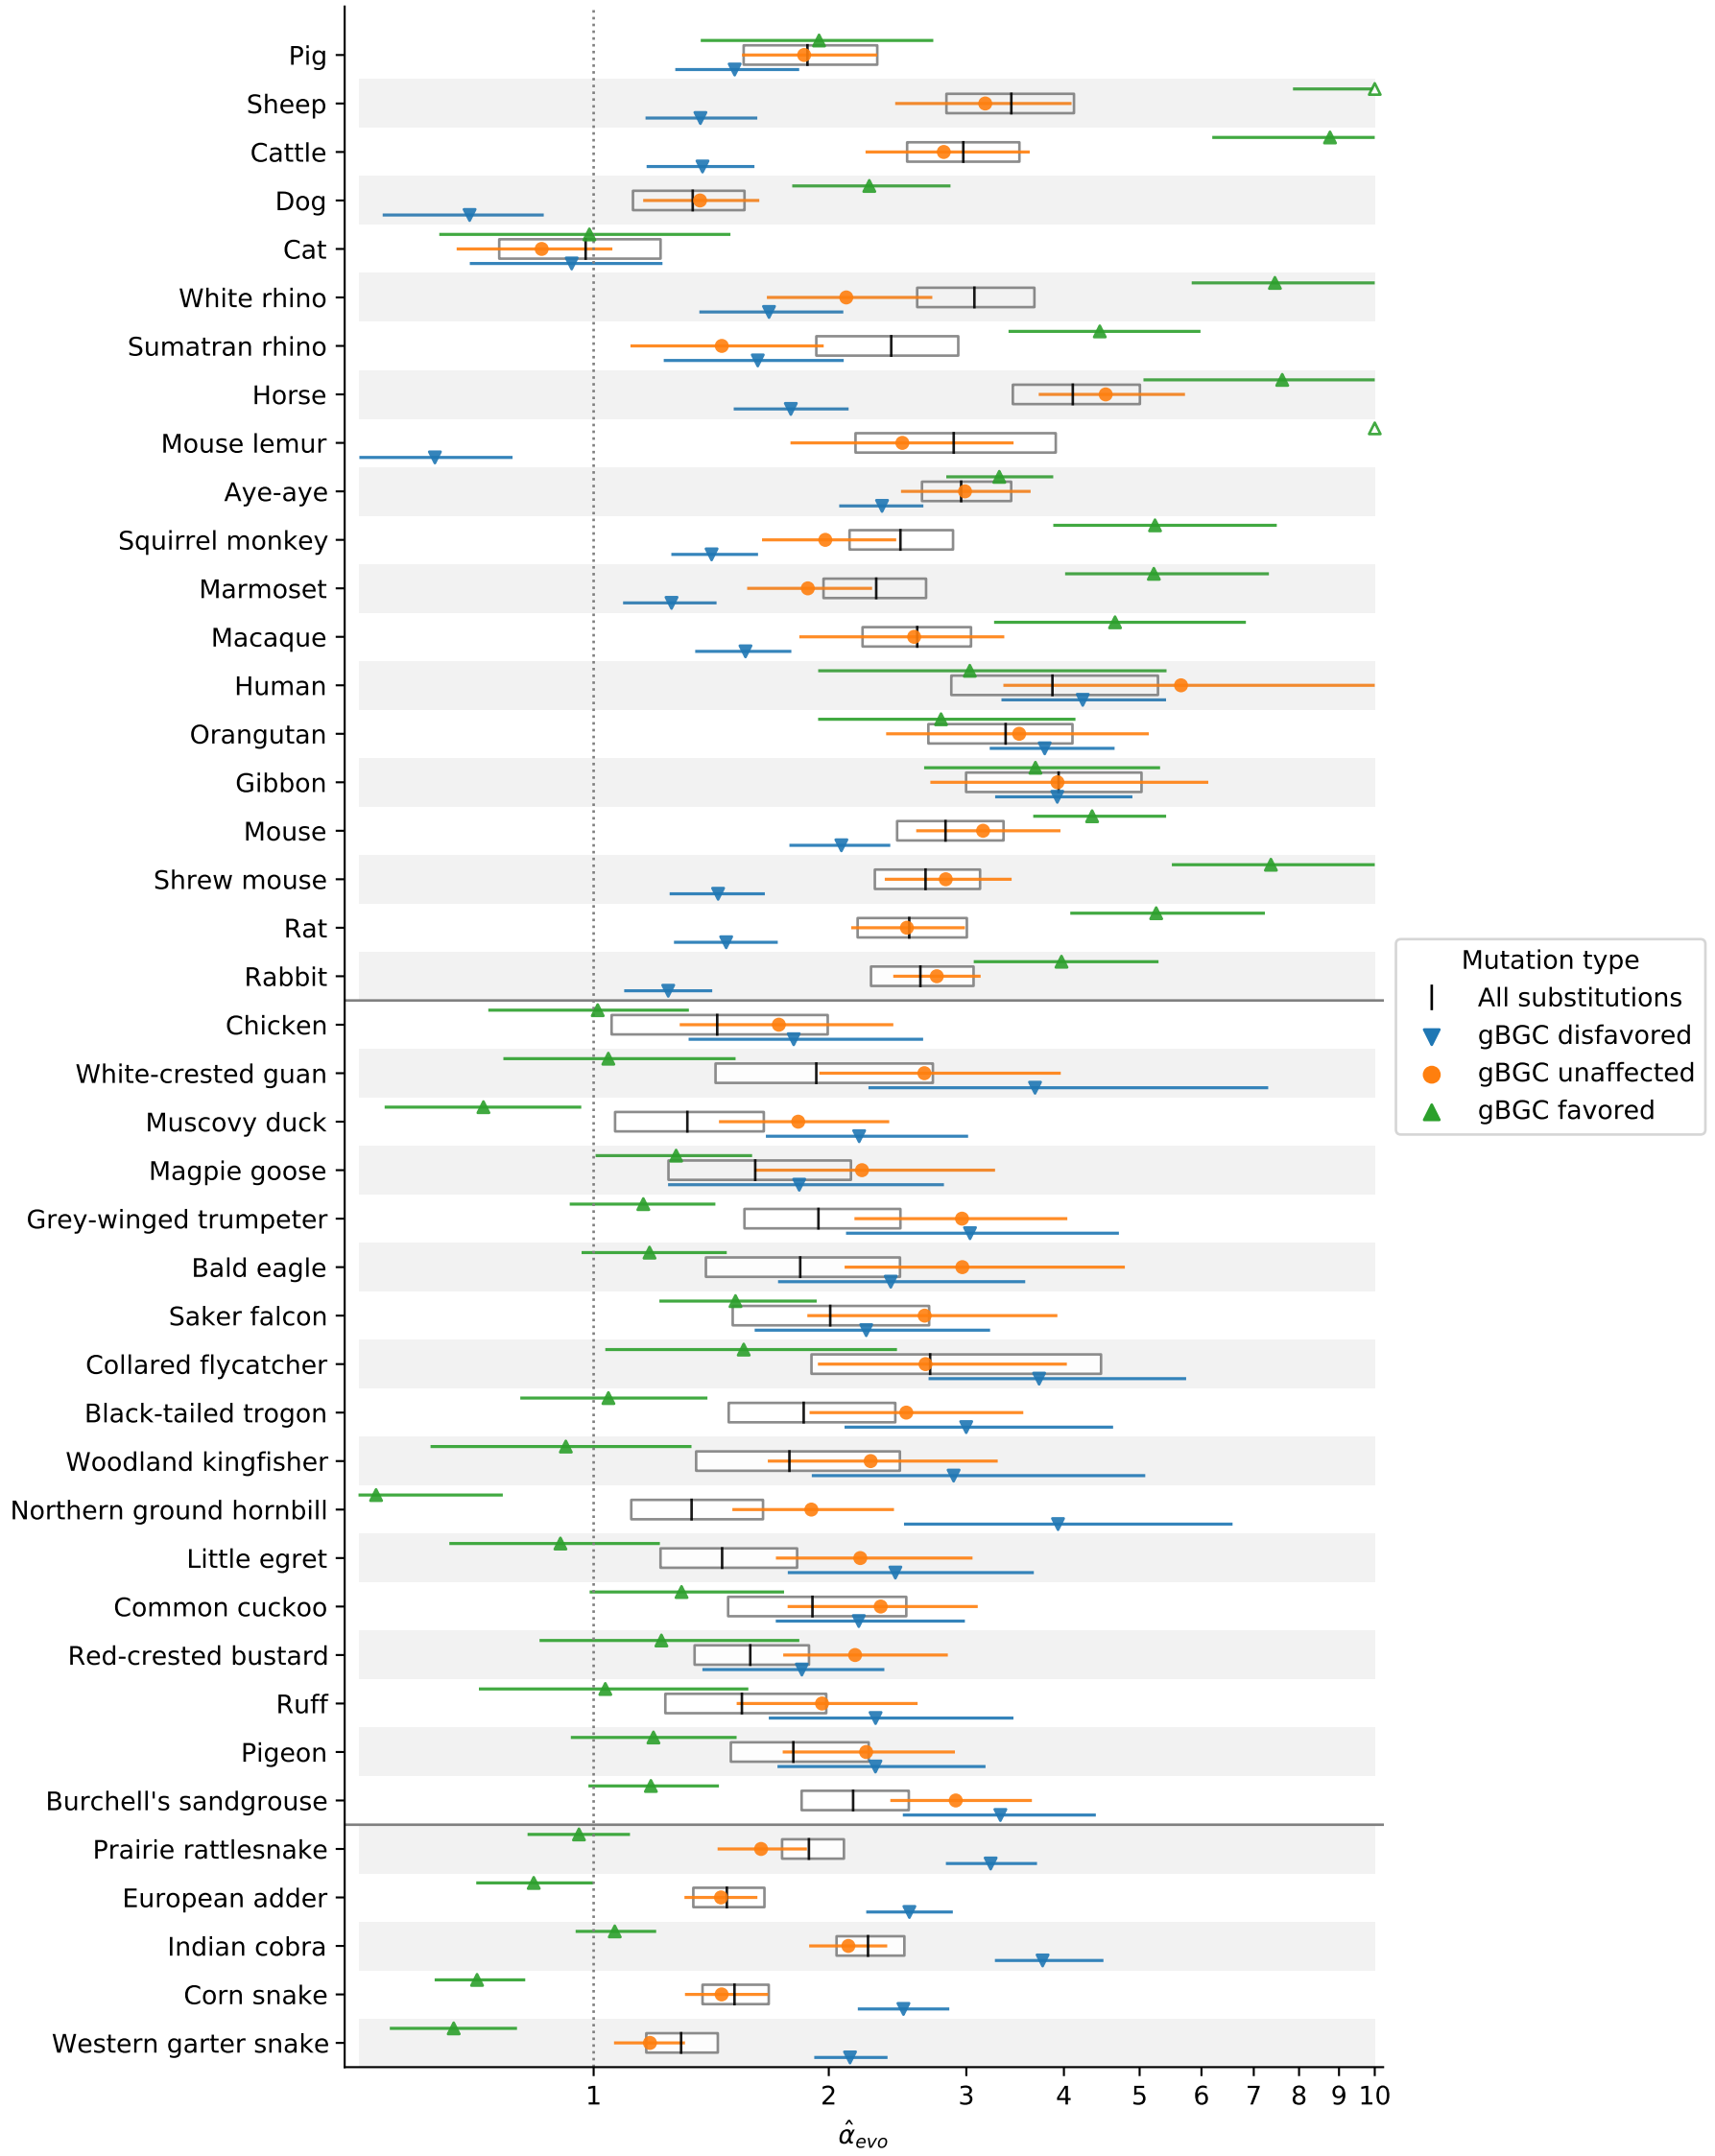

Supplement: supp [file elife-80008-supp-v1.zip]

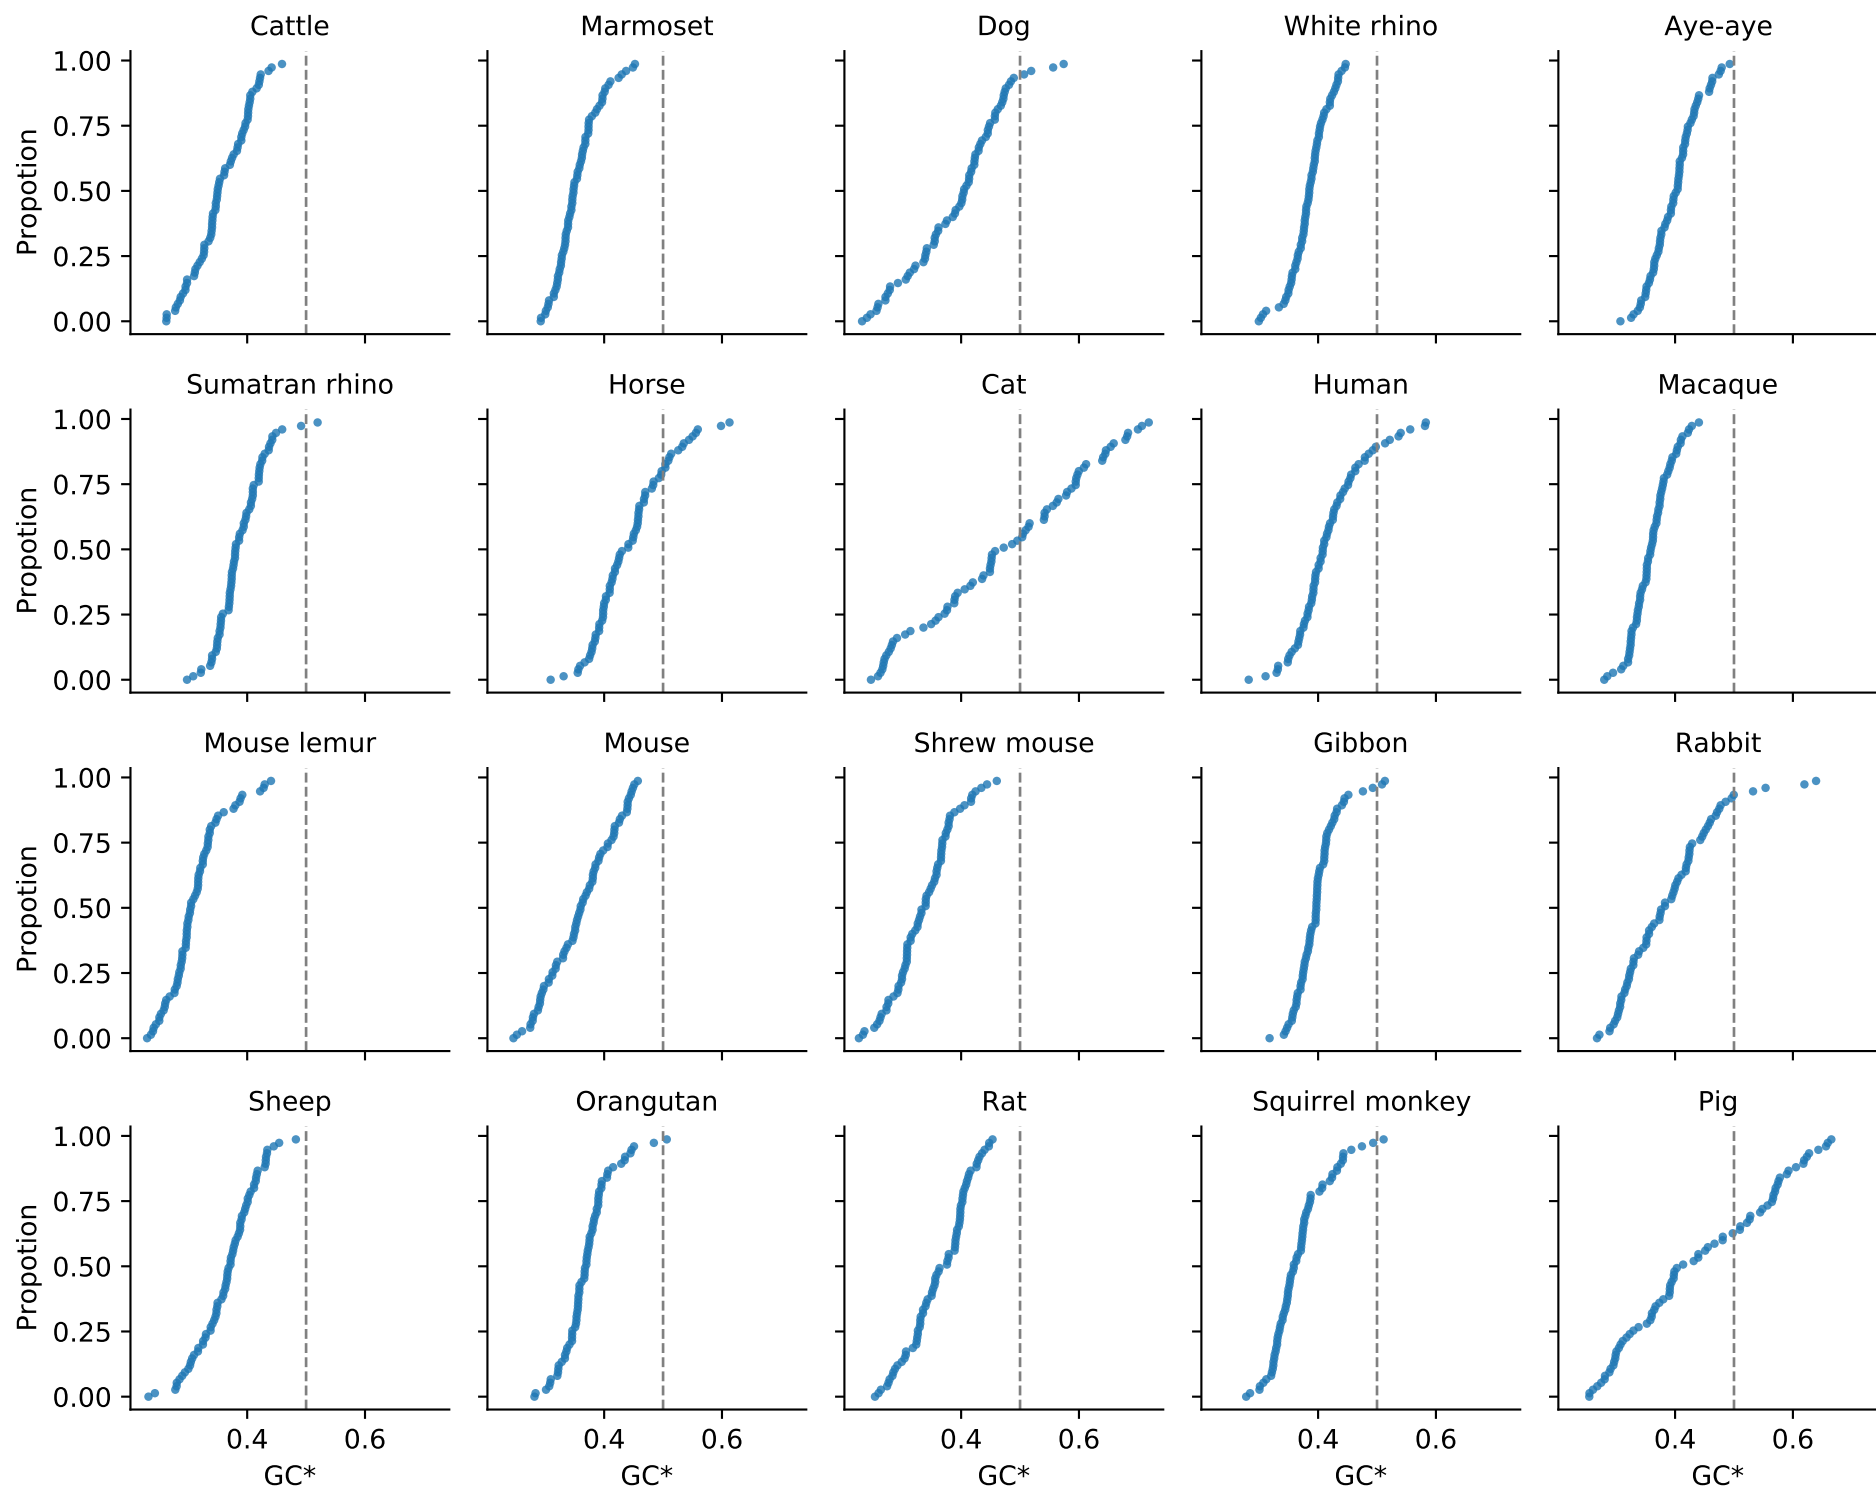

Supplement: supp [file elife-80008-supp-v1.zip]

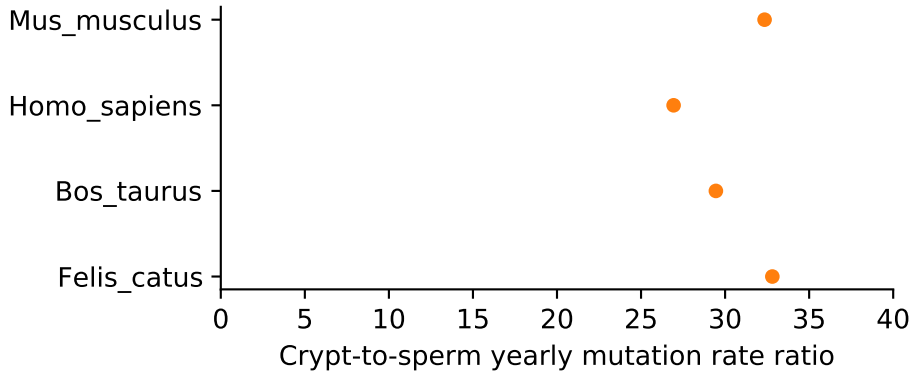

Supplement: supp [file elife-80008-supp-v1.zip]

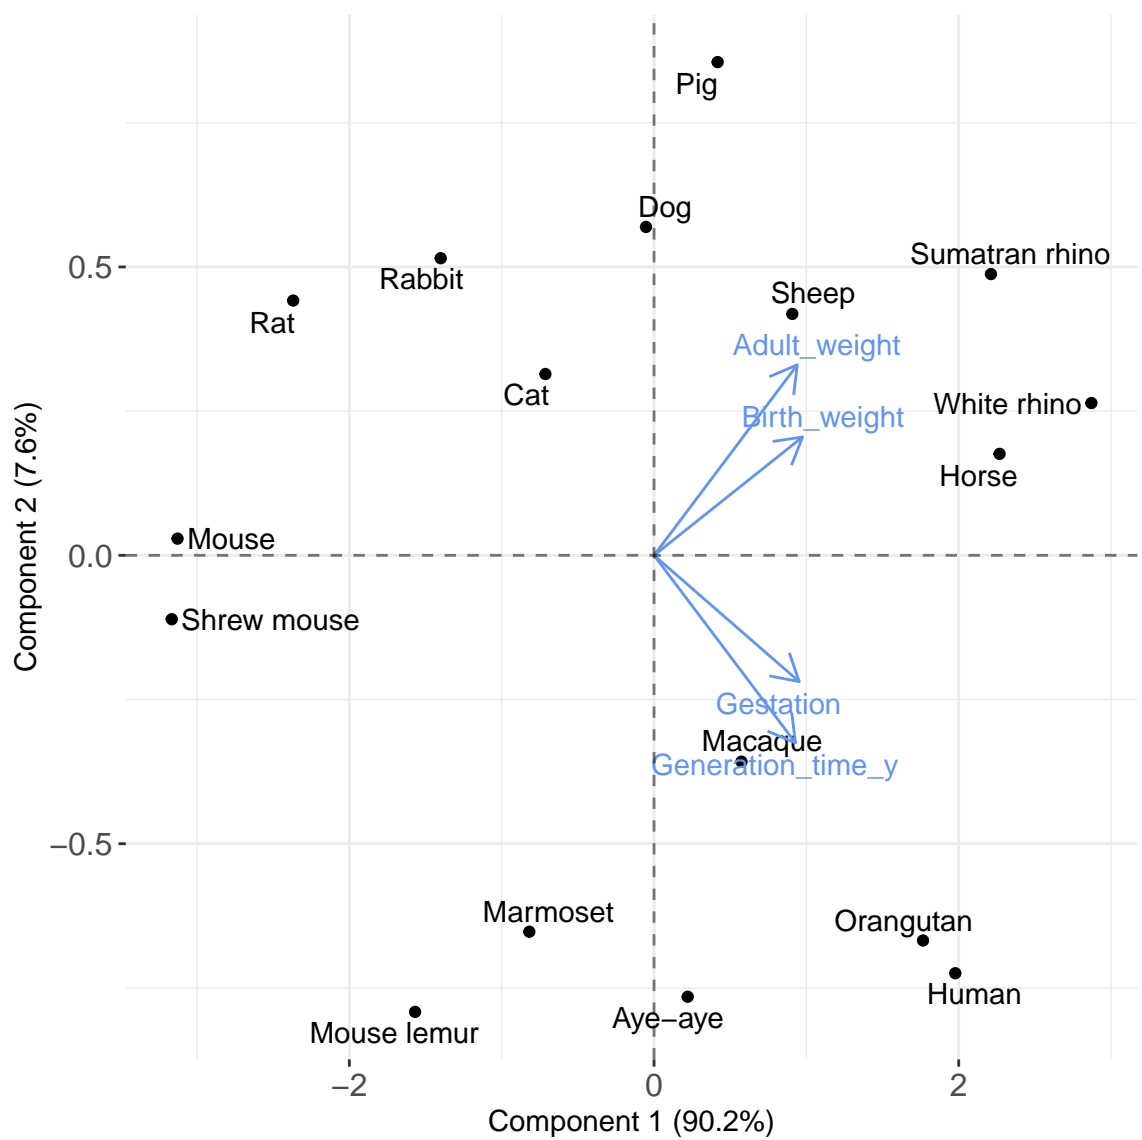

Supplement: supp [file elife-80008-supp-v1.zip]

# Comparison of $\hat{\alpha}_{evo}$ in each branch under variations of the pipeline

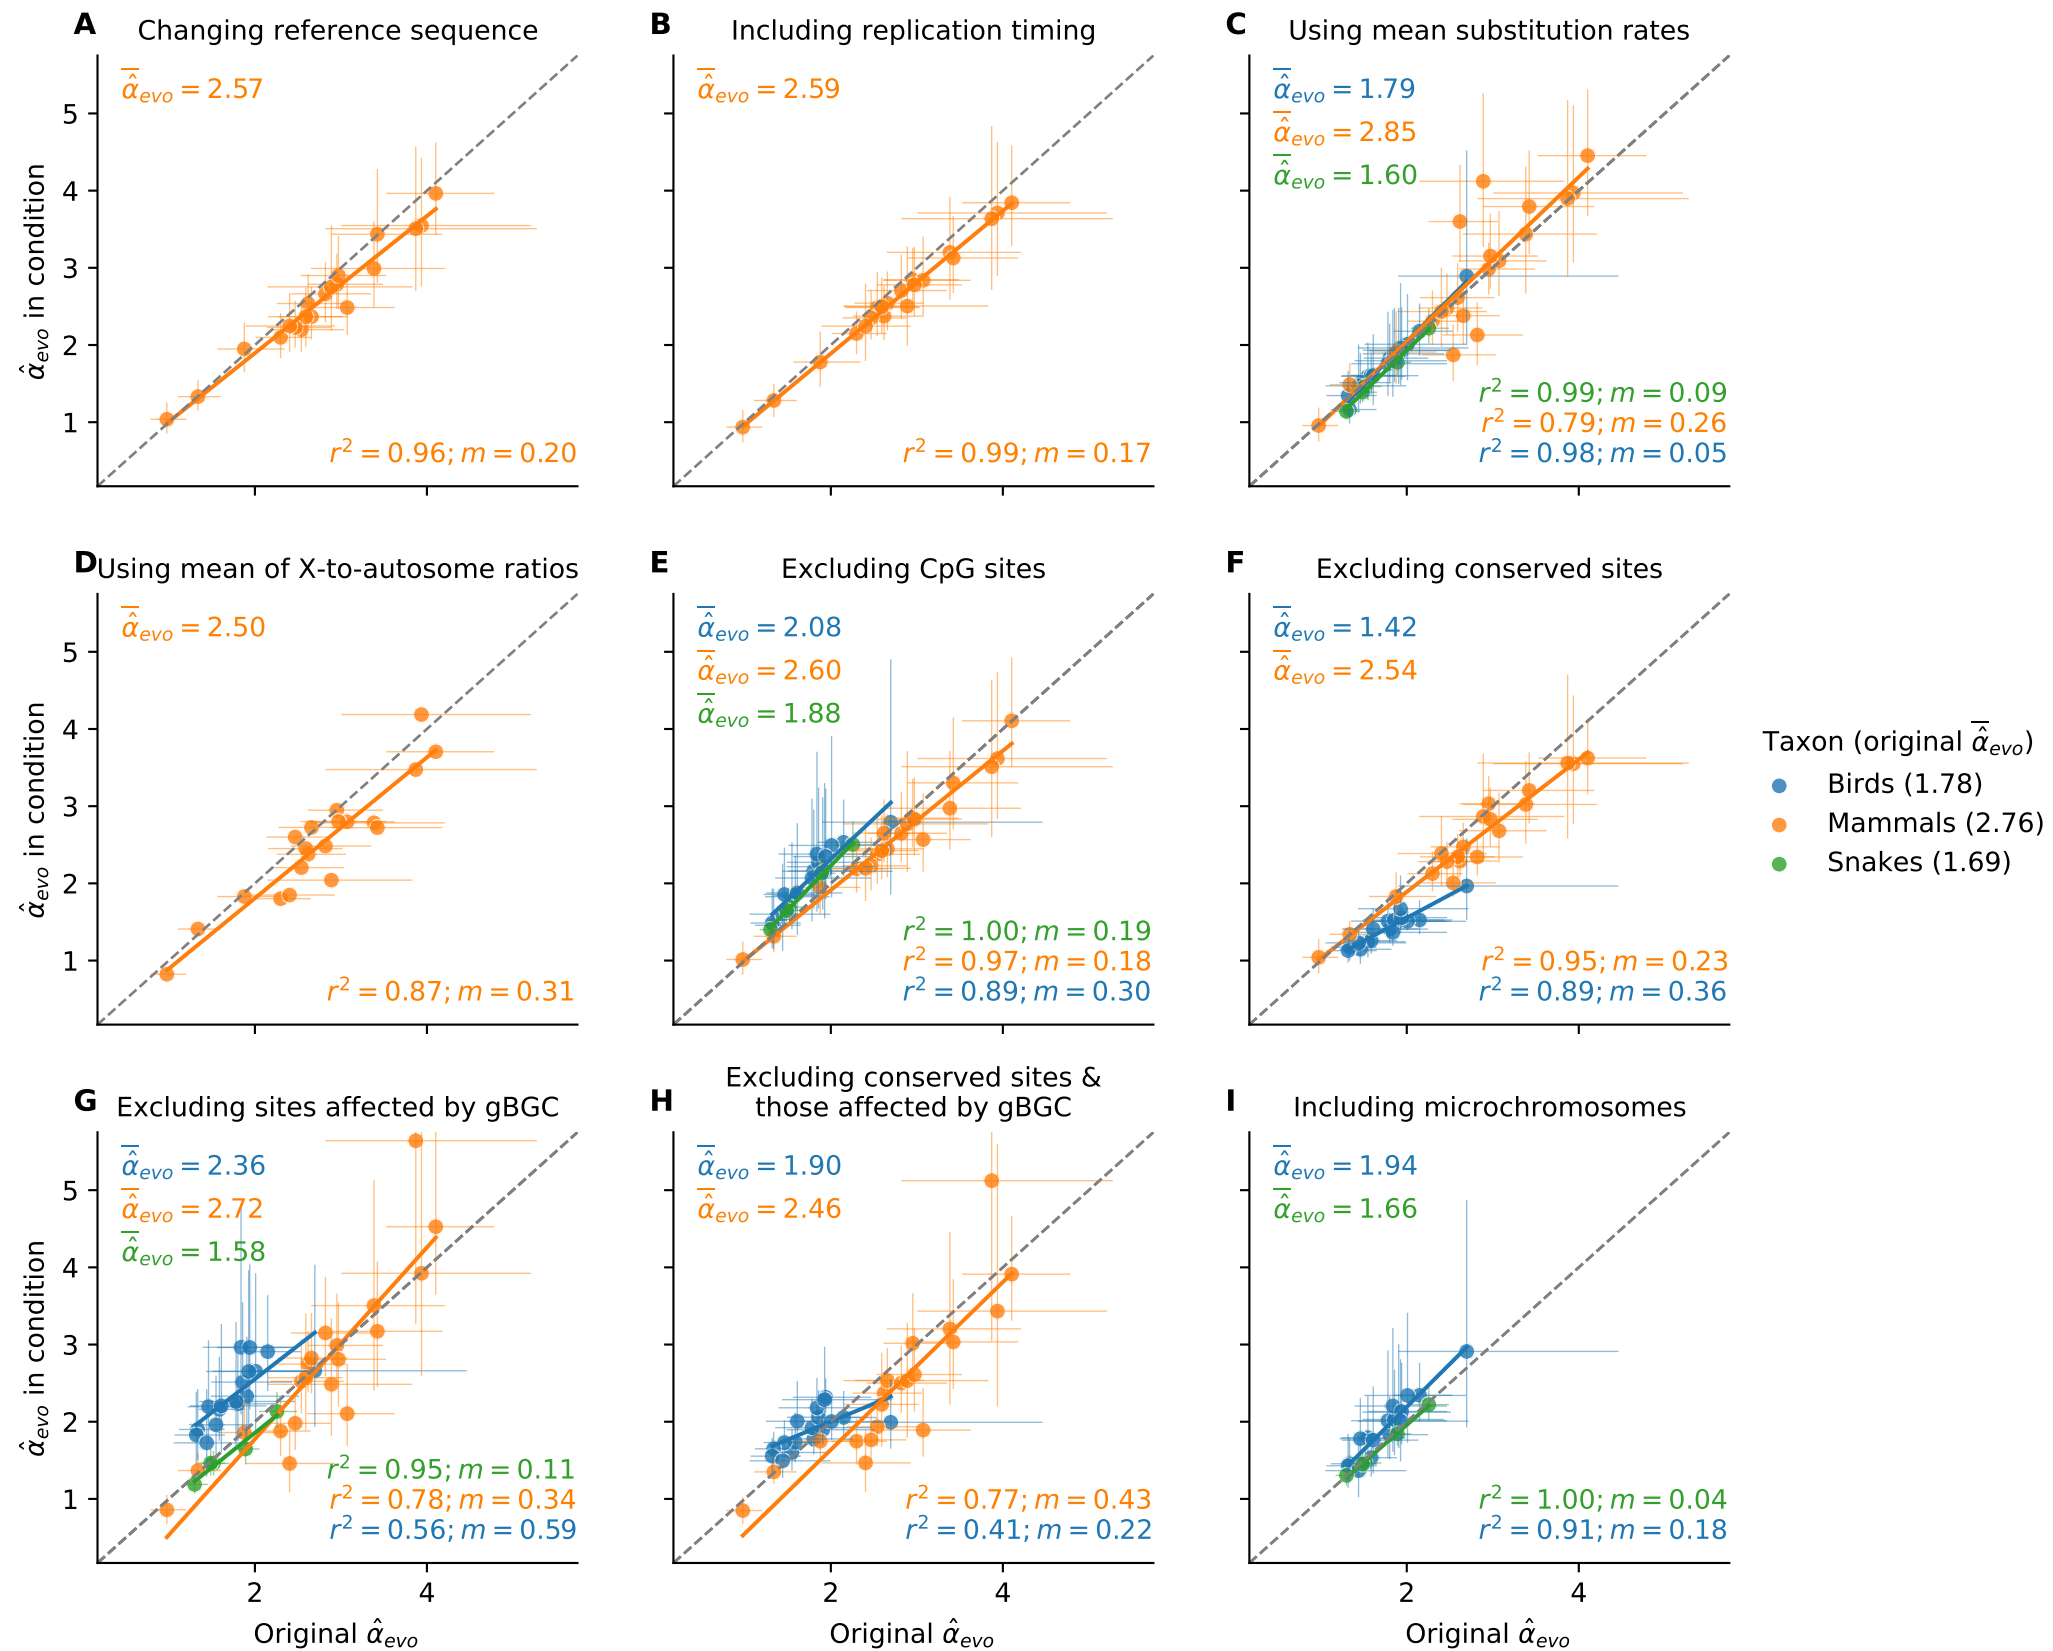

Supplement: supp [file elife-80008-supp-v1.zip]

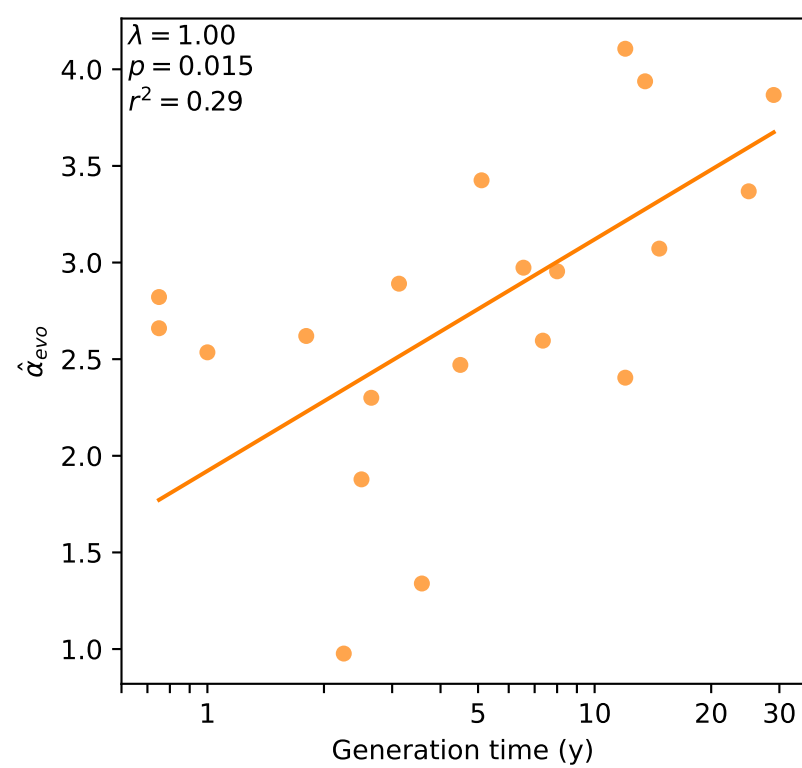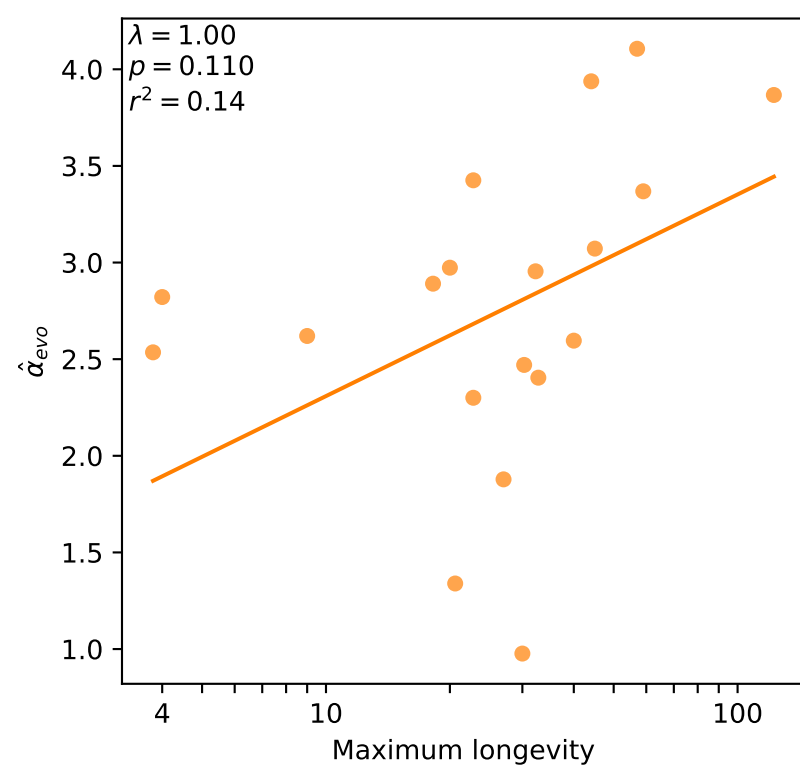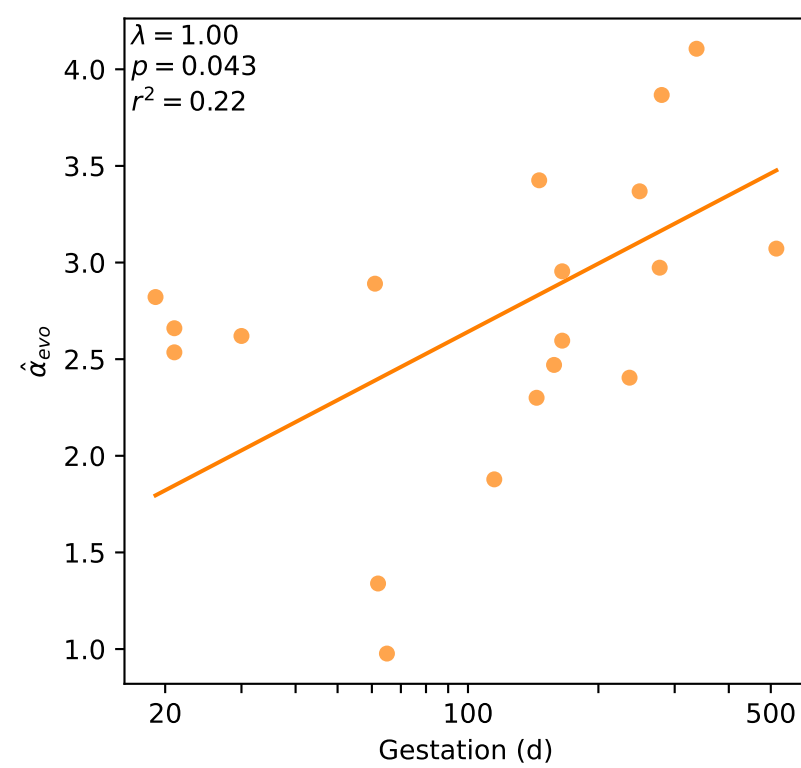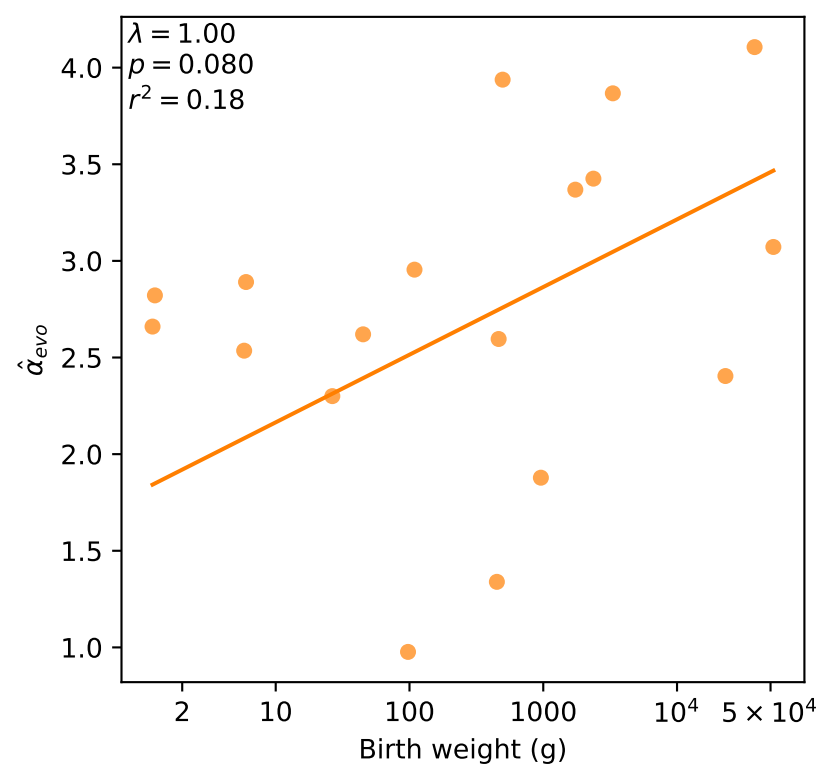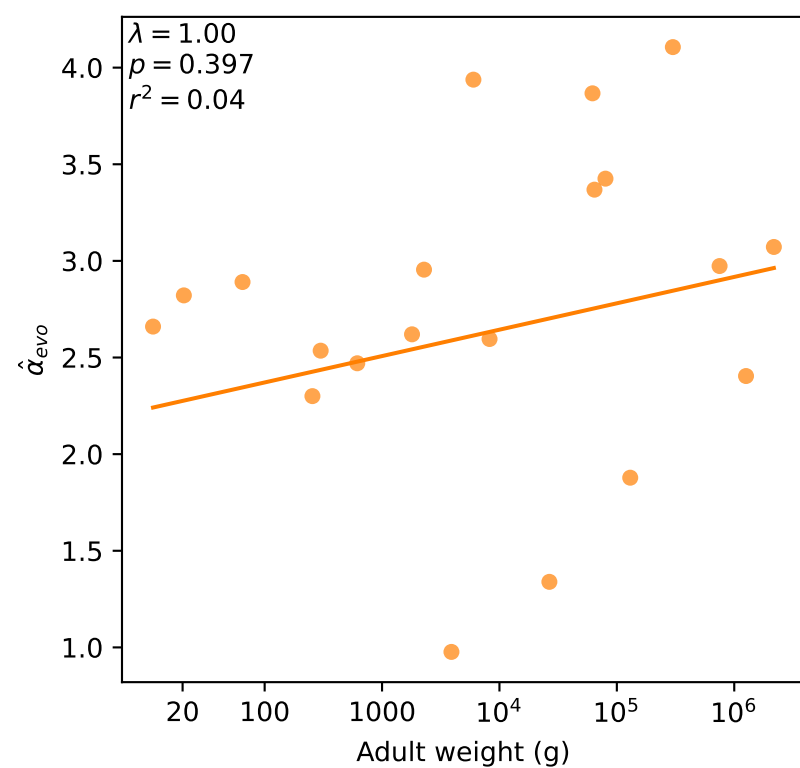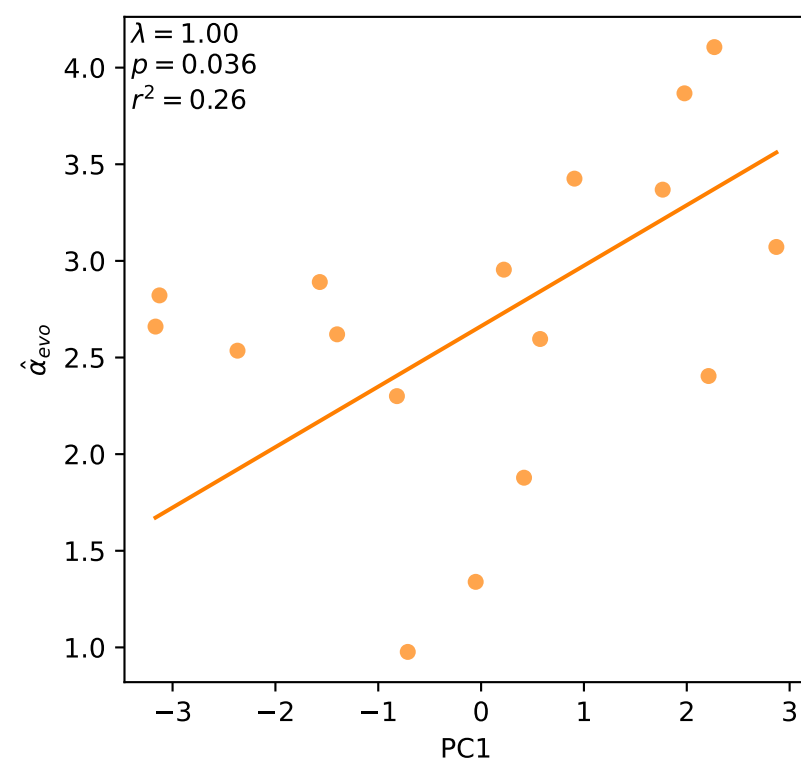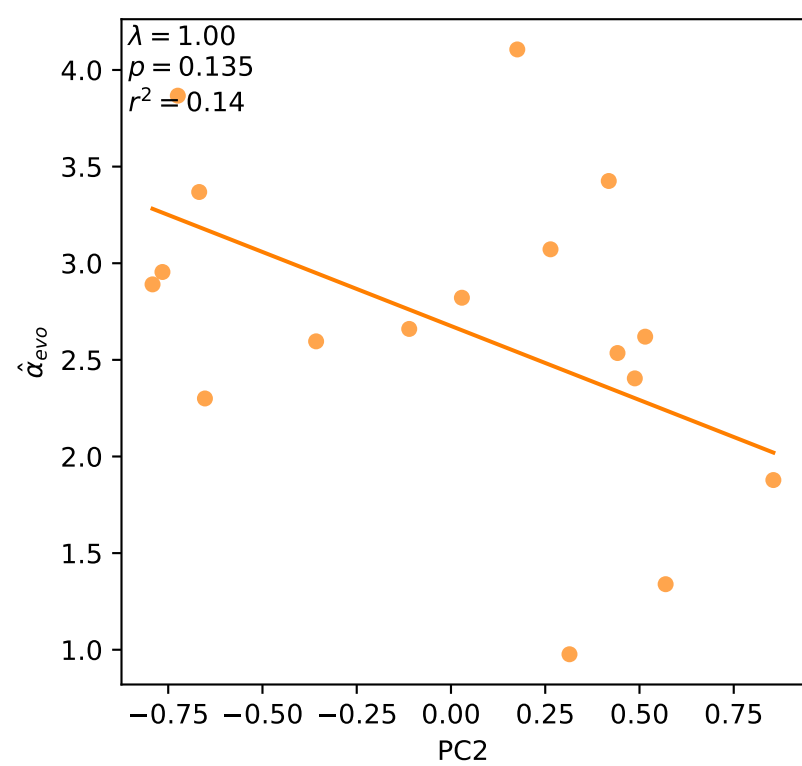

Supplement: supp [file elife-80008-supp-v1.zip › elife_poa_e80008_Figure_3_figure_supplement_1.pdf]
